# Supplementary material for: Hesperidin Prevents Retinal and Plasma Abnormalities in Streptozotocin-Induced Diabetic Rats
Source: Molecules. 2012 Nov 1;17(11):12868–81. doi: 10.3390/molecules171112868 (PMC6268103; doi:10.3390/molecules171112868)

# Supporting Information

As shown in  $^{13}\text{C}$ -NMR spectrum of hesperidin below, the hesperidin we used in the experiment is a mixture of (2*S*)- and (2*R*)-hesperidin.

**Figure 1.** The  $^{13}\text{C}$ -NMR spectrum of hesperidin (DMSO, 125MHz).

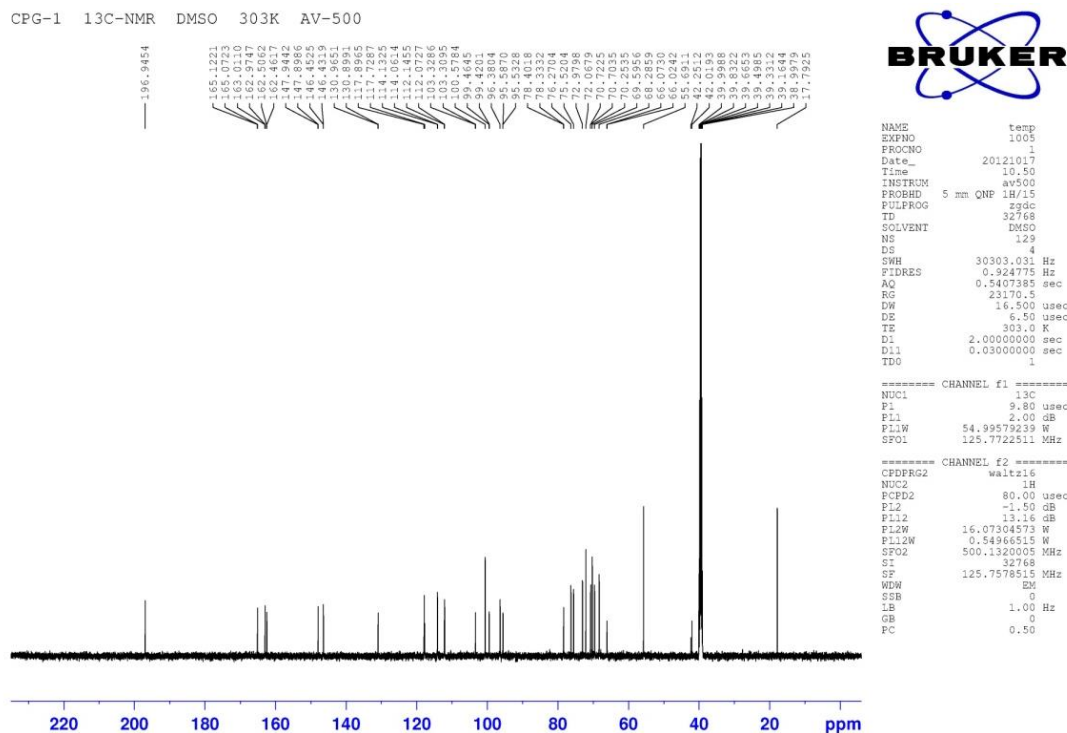

**Figure 2.** The amplified  $^{13}\text{C}$ -NMR spectrum of hesperidin (100–165 ppm).

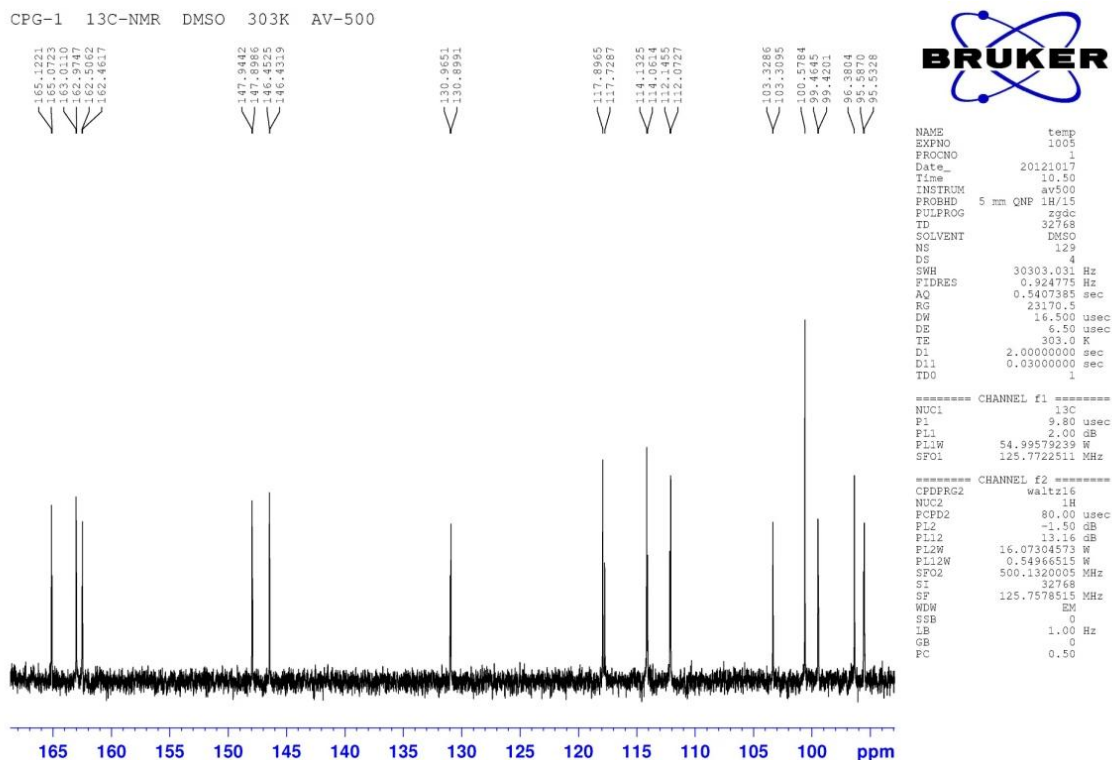

**Figure 3.** The amplified  $^{13}\text{C}$ -NMR spectrum of hesperidin (67–79 ppm).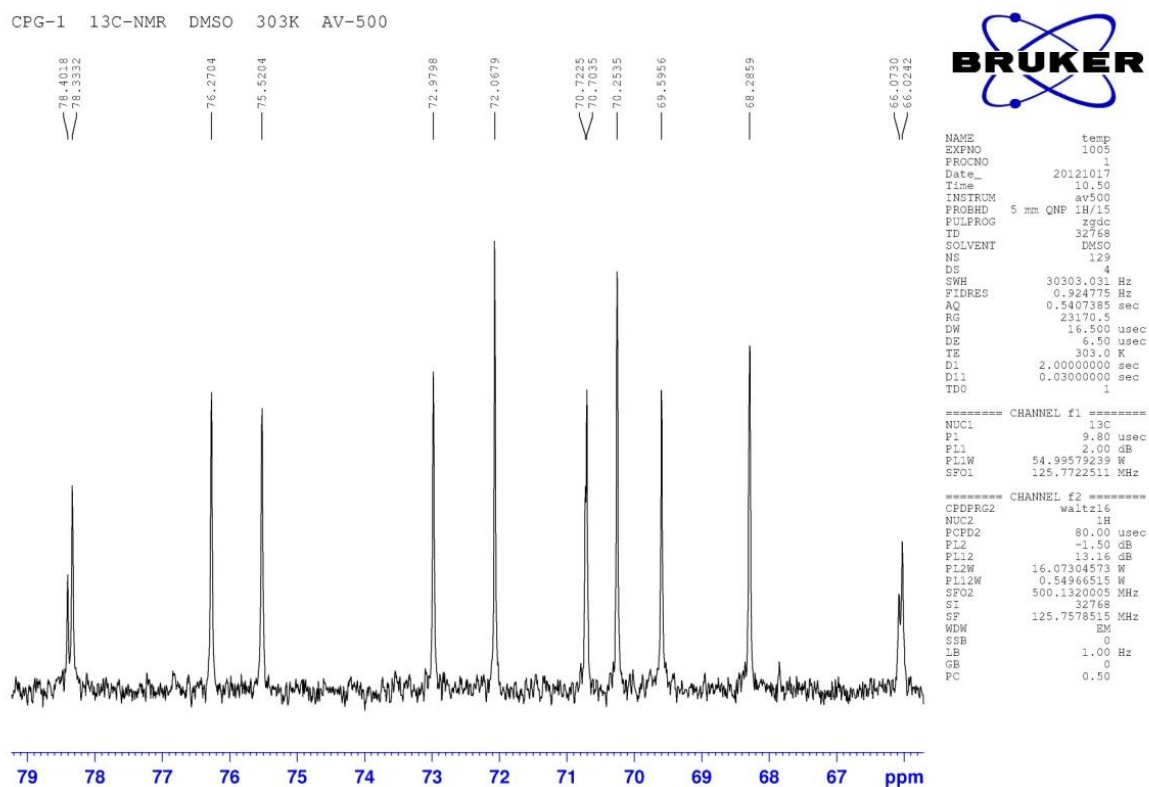**Figure 4.** The amplified  $^{13}\text{C}$ -NMR spectrum of hesperidin (20–55 ppm).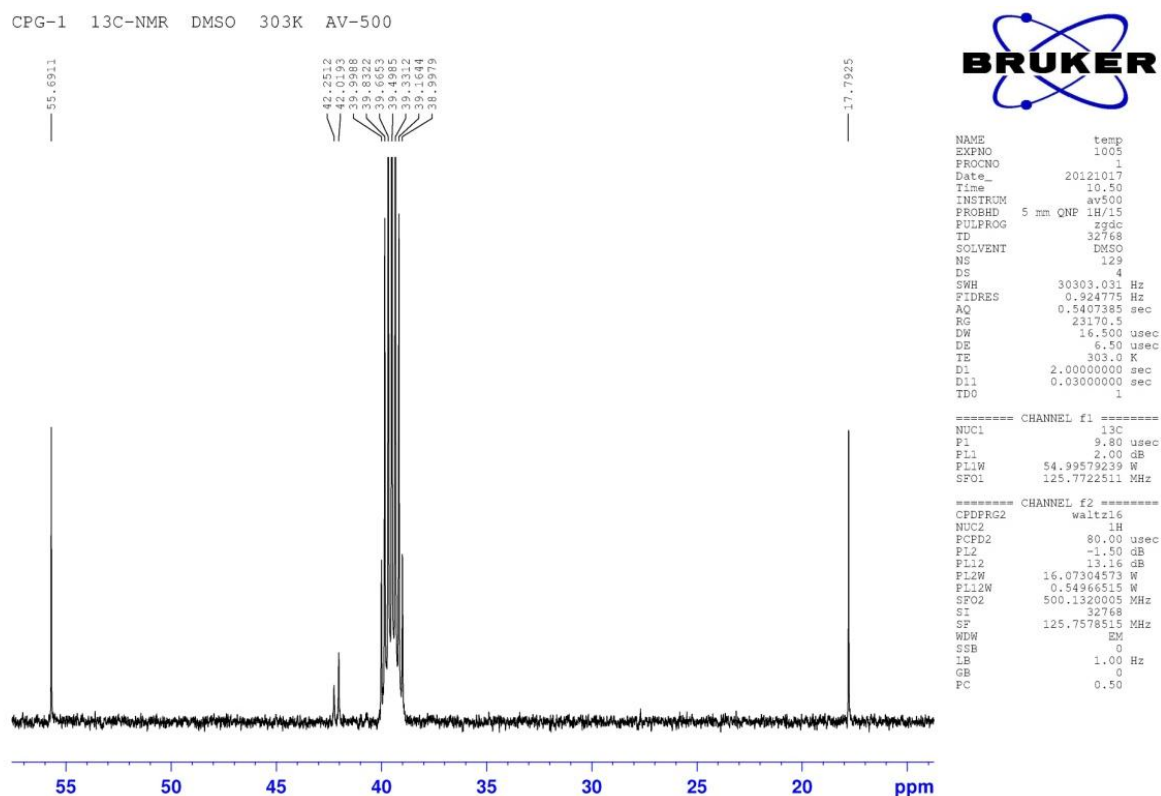

Supplement: Supplementary file 1 [file molecules-17-12868-s001.pdf]
